# Supplementary material for: Next Generation Chemiluminescent Probes for Antimalarial Drug Discovery
Source: PubMed Central journal article supplement — ACS Infect Dis. 2024 Apr 1;10(4):1286–97. doi: 10.1021/acsinfecdis.3c00707 (PMC11019541; doi:10.1021/acsinfecdis.3c00707), 2024-04-01
Supplement: id3c00707_si_001.pdf [file id3c00707_si_001.pdf]

## **Supporting Information**

### **Next generation chemiluminescent probes for antimalarial drug discovery**

Angela Hellingman<sup>1,2</sup>, Kleopatra Sifoniou<sup>1,2</sup>, Tamara Buser<sup>1,2</sup>, Basil T. Thommen<sup>1,2</sup>, Annabelle Walz<sup>1,2</sup>, Armin Passecker<sup>1,2</sup>, James Collins<sup>3</sup>, Mario Hupfeld<sup>3</sup>, Sergio Wittlin<sup>\*,1,2</sup>, Kathrin Witmer<sup>\*,1,2,3</sup>, and Nicolas M. B. Brancucci<sup>\*,1,2</sup>

<sup>1</sup> Department of Medical Parasitology and Infection Biology, Swiss Tropical and Public Health Institute, 4123 Allschwil, Switzerland

<sup>2</sup> University of Basel, 4001 Basel, Switzerland

<sup>3</sup> NEMIS Technologies AG, 8804 Au ZH, Switzerland

\* Corresponding authors: Nicolas M. B. Brancucci (nicolas.brancucci@swisstph.ch), Kathrin Witmer (kathrin.witmer@gmail.com), Sergio Wittlin (sergio.wittlin@swisstph.ch)

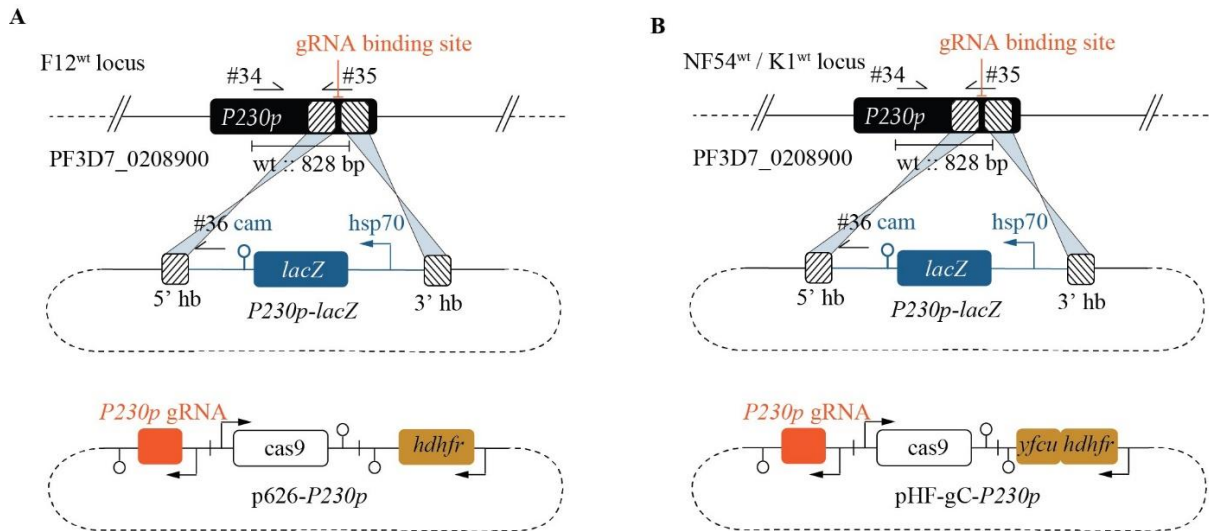

**Figure S1. Overview of the two-plasmid CRISPR/Cas9-based gene editing strategy. (A)** Schematic of the *P230p* locus in wild-type F12 parasites and the plasmids used for CRISPR/Cas9-mediated gene editing (*P230p-lacZ* and *p626-P230p*) to generate the F12<sup>lacZ</sup> parasites. **(B)** Wild-type *P230p* loci in NF54 and K1 parasites and the plasmids used for CRISPR/Cas9-mediated gene editing (*P230p-lacZ* and *pHF-gC-P230p*) to generate the NF54<sup>lacZ</sup> and K1<sup>lacZ</sup> parasites. The heterologous expression cassette inserted into the *P230p* locus consists of an *hsp70* promoter, the *lacZ* gene and a *cam* terminator. Arrows indicate primers used for diagnostic PCRs. Striped boxes represent the homology regions used for CRISPR/Cas9-editing. The guideRNA binding site is indicated. *cas9*, recombinase; *yfcu*, negative selection marker<sup>1</sup> (yeast cytosine deaminase and uridyl phosphoribosyl transferase); hb, homology boxes; wt, wild-type.

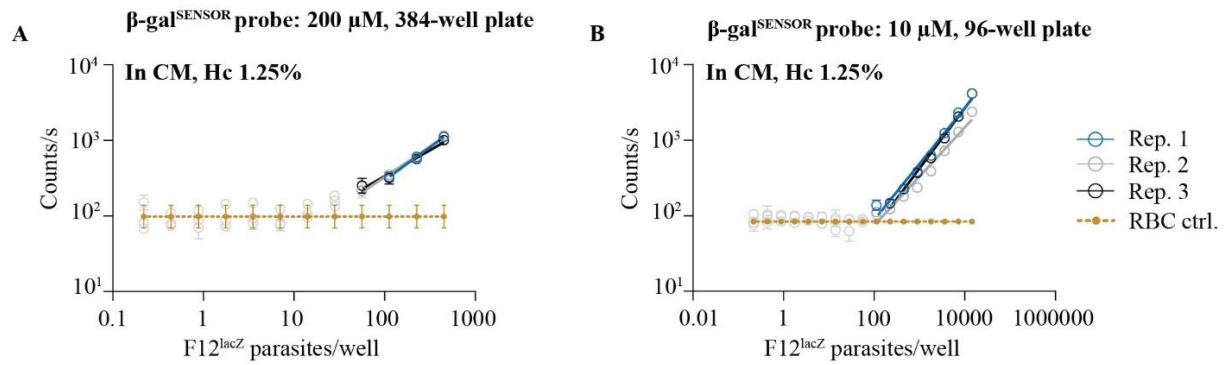

**Figure S2. The  $\beta$ -gal<sup>SENSOR</sup> probe allows detecting low numbers of F12<sup>lacZ</sup> parasites under assay conditions.** (A) Mixed-stage F12<sup>lacZ</sup> parasites are detected at low numbers (~50 parasites/well) when incubated with  $\beta$ -gal<sup>SENSOR</sup> probe at 200  $\mu$ M in CM with a Hc of 1.25% and emitted chemiluminescence linearly correlates with parasite numbers. (B) Compared to (A), the LOD increases (~200 parasites/well) when reducing the  $\beta$ -gal<sup>SENSOR</sup> probe to 10  $\mu$ M and performing the experiments in 96-wel plates (assay conditions). n = 3; biological replicates (rep.) are shown individually with error bars indicating standard deviations of technical replicates; for the control samples (ctrl.), biological replicates are averaged and error bars indicate standard deviations of the mean.

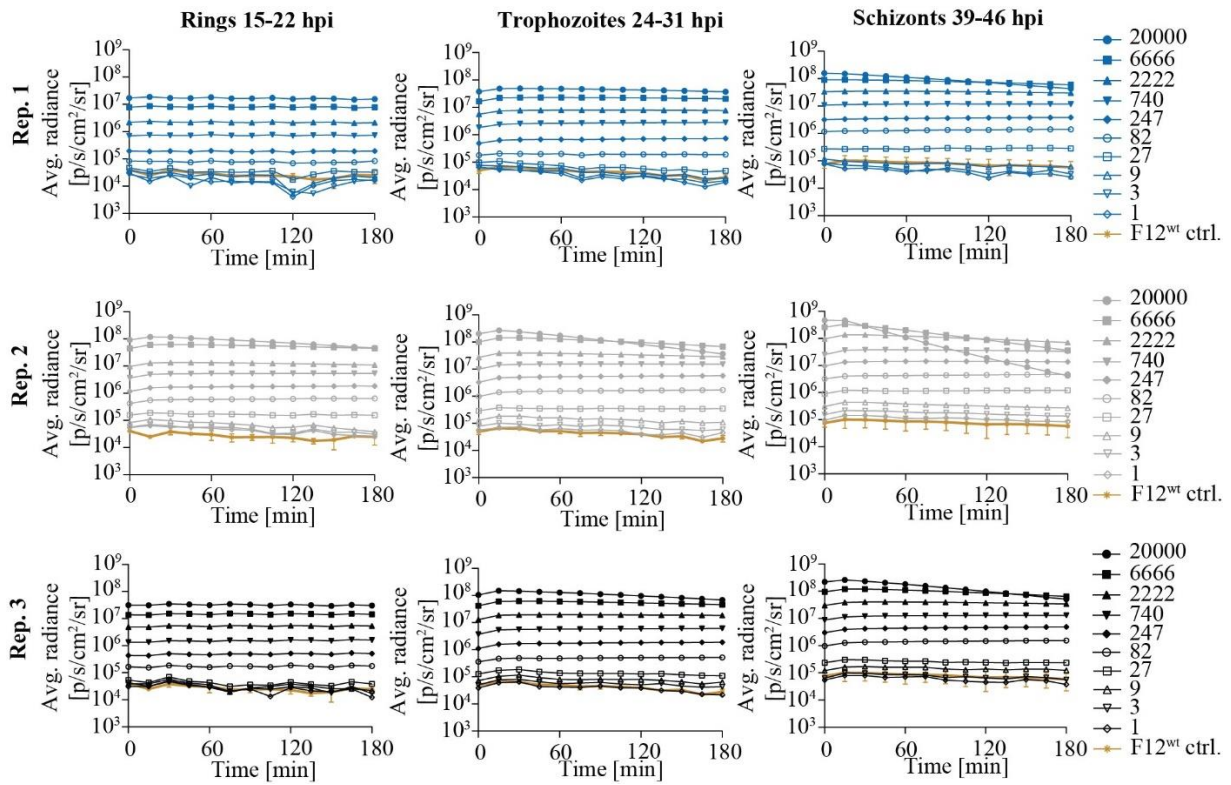

**Figure S3. Luminescence emitted from F12<sup>lacZ</sup> parasites remains stable.** Following addition of the  $\beta$ -gal<sup>SENSOR</sup> probe, luminescence flux is stable over a wide range of absolute parasite numbers for at least 180 min. Parasite numbers used per condition are indicated. 20`000 wild-type parasites (F12<sup>wt</sup>) were used as a negative control sample. n = 3.

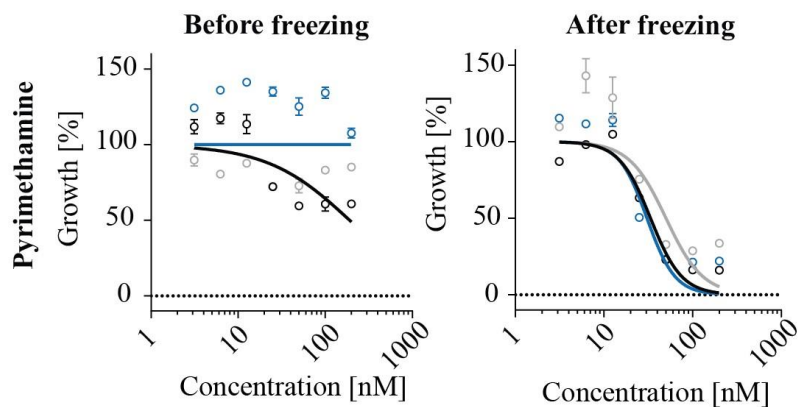

| IC <sub>50</sub> $\beta$ -gal <sup>SENSOR</sup> probe assay |                 |                |
|-------------------------------------------------------------|-----------------|----------------|
| Pyrimethamine                                               | Before freezing | After freezing |
| —○— Rep. 1                                                  | -               | 30.51          |
| —○— Rep. 2                                                  | -               | 49.99          |
| —○— Rep. 3                                                  | -               | 33.44          |

**Figure S4. Freezing of the  $\beta$ -gal<sup>SENSOR</sup> probe assay plates prior to the readout is strongly recommended.** For pyrimethamine, it was not possible to calculate the IC<sub>50</sub> values when the assay plates were not frozen prior to the readout with 10  $\mu$ M  $\beta$ -gal<sup>SENSOR</sup> probe. Biological replicates (rep.) are shown individually. IC<sub>50</sub> values [nM] are indicated.

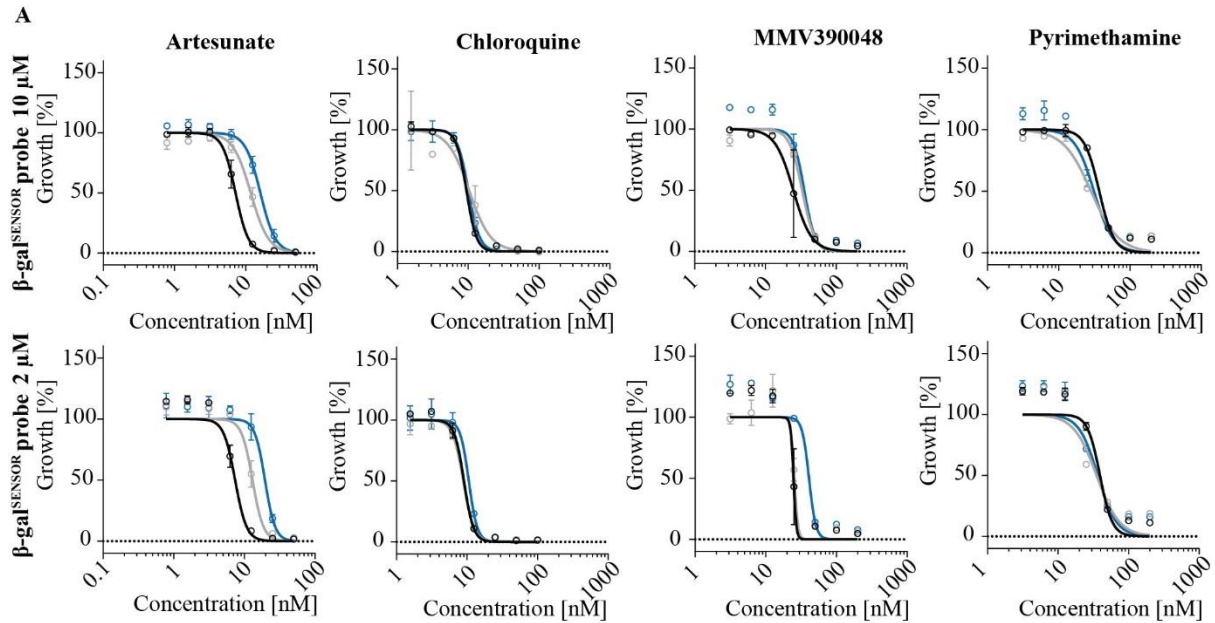

| Drug                    | IC <sub>50</sub> [nM] F12 <sup>lacZ</sup> |       |             |       |           |       |               |       |
|-------------------------|-------------------------------------------|-------|-------------|-------|-----------|-------|---------------|-------|
|                         | Artesunate                                |       | Chloroquine |       | MMV390048 |       | Pyrimethamine |       |
| β-gal <sup>SENSOR</sup> | 10 μM                                     | 2 μM  | 10 μM       | 2 μM  | 10 μM     | 2 μM  | 10 μM         | 2 μM  |
| ○ Rep. 1                | 7.19                                      | 7.39  | 9.44        | 9.03  | 24.72     | 24.68 | 36.99         | 39.22 |
| ○ Rep. 2                | 11.77                                     | 13.03 | 10.32       | 8.83  | 32.93     | 25.41 | 28.34         | 35.09 |
| ○ Rep. 3                | 16.06                                     | 19.55 | 10.06       | 10.58 | 35.30     | 40.89 | 31.17         | 36.44 |
| Avg. IC <sub>50</sub>   | 11.67                                     | 13.32 | 9.94        | 9.48  | 30.98     | 30.33 | 32.17         | 36.92 |
| SD IC <sub>50</sub>     | 3.62                                      | 4.97  | 0.37        | 0.78  | 4.53      | 7.48  | 3.60          | 1.72  |

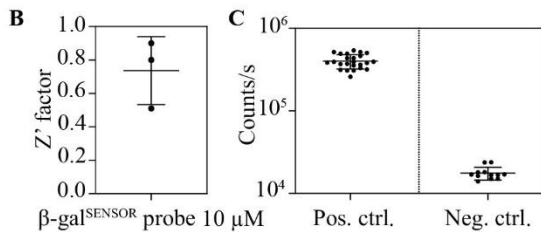

**Figure S5. *lacZ*-expressing parasites allow monitoring dose-responses at different β-gal<sup>SENSOR</sup> probe concentrations.** (A) Comparison the F12<sup>lacZ</sup>/β-gal<sup>SENSOR</sup> probe assay formats using either 10 or 2 μM β-gal<sup>SENSOR</sup> probe. Biological replicates (Rep.) are shown individually. IC<sub>50</sub> values [nM] are indicated. Avg., average; SD, standard deviation. (B) Assay robustness using β-gal<sup>SENSOR</sup> probe at 10 μM determined by the Z'-factor. n = 3. (C) Luminescence derived from F12<sup>lacZ</sup> parasite cultures lysed at the start of the experiment (negative control) and untreated F12<sup>lacZ</sup> following the 72-hour incubation period (positive control).

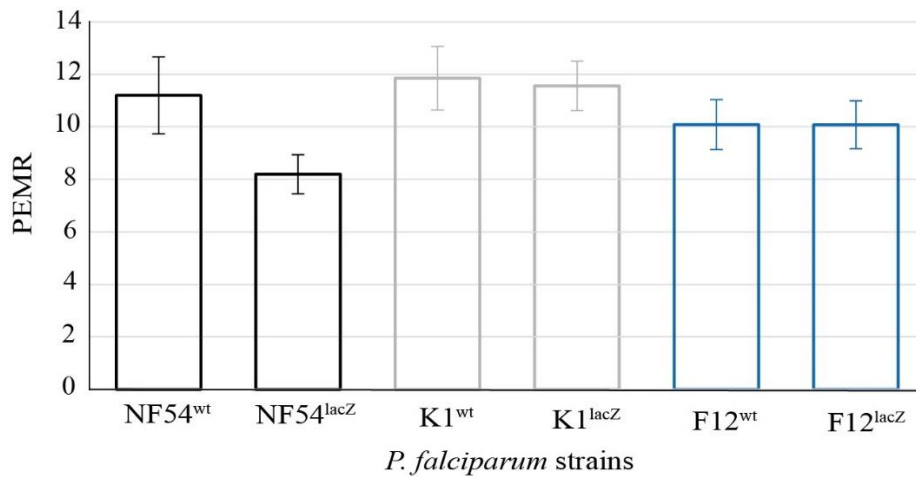

**Figure S6:** Parasitized Erythrocyte Multiplication Rate (PEMR) is comparable among parental *P. falciparum* strains and transgenic strains. n = 3. wt, wild type.

**Table S1. The  $\beta$ -gal<sup>SENSOR</sup> probe IC<sub>50</sub> assay is cost effective.** The price of one IC<sub>50</sub> assay plate (96-well format) using the *lacZ*/ $\beta$ -gal<sup>SENSOR</sup> probe 2  $\mu$ M system can be reduced by one third compared to the [<sup>3</sup>H]-hypoxanthine incorporation assay.

| Currency: USD          | IC <sub>50</sub> assay costs per plate |                                                |
|------------------------|----------------------------------------|------------------------------------------------|
|                        | [ <sup>3</sup> H] incorporation        | $\beta$ -gal <sup>SENSOR</sup> probe 2 $\mu$ M |
| Drug preparation       | 3.29                                   | 3.31                                           |
| Plate preparation      | 9.15                                   | 12.85                                          |
| Readout reagent        | 12.86                                  | 5.88                                           |
| Readout consumables    | 7.82                                   | -                                              |
| <b>Total per plate</b> | <b>33.12</b>                           | <b>22.04</b>                                   |

## References

1. Manzoni G, Briquet S, Risco-Castillo V, Gaultier C, Topçu S, Ivănescu ML, Franetich JF, Hoareau-Coudert B, Mazier D, Silvie O. A rapid and robust selection procedure for generating drug-selectable marker-free recombinant malaria parasites. *Sci Rep.* 2014;4:4760. doi:10.1038/srep04760.
